# Supplementary material
Source: PubMed Central journal article supplement (PMC6014626)
Supplement: NIHMS971210-supplement.pdf [file NIHMS971210-supplement.pdf]

## Supplemental Figures and legends

**Figure S1. Quantification of EGL area of WT and *Smo<sup>cko</sup>* mutants shown in Figure 3A.** A significant reduction in mutants compared to WT littermates at both stages. At P3, the *Smo<sup>cko</sup>* mutant EGL was significantly reduced in area by 24.8% (n=3, p=0.0014) and at P5, the reduction in EGL area was 50.3% (n=3, p<0.0001).

**Figure S2. *Smo<sup>cko</sup>* mutants display altered BG arrangement and cytoarchitecture.** A lower magnification views of the main Figure 6B. Abbreviations: EGL, external granular layer. PCL, Purkinje cell layer. IGL, internal granular layer.

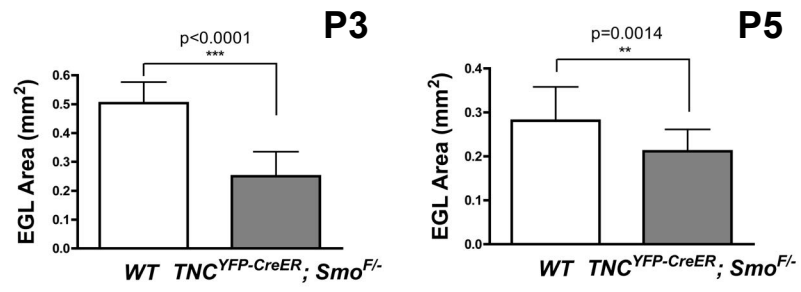

Cheng et al. Supplemental Figure 1

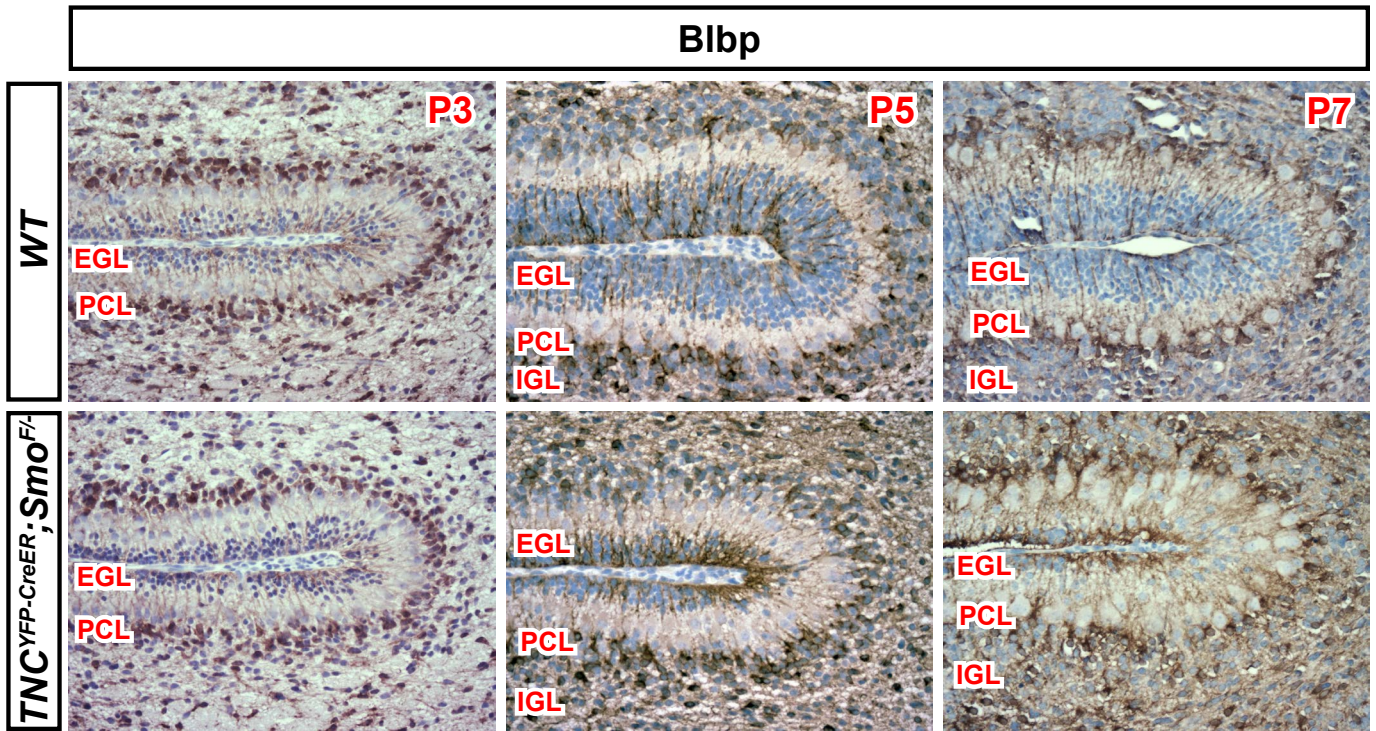

Cheng et al. Supplemental Figure 2
